# Supplementary material for: Structural diversity of metal–organic frameworks based on a chalcone dicarboxylic acid ligand
Source: Royal Society of Chemistry journal article supplement (doi:10.1039/d0dt00654h), 2020-01-01
Supplement: d0dt00654h1.pdf [file d0dt00654h1.pdf]

## Structural diversity of metal-organic frameworks based on chalcone dicarboxylic acid

Hao Xu,<sup>a,b</sup> Xianghua Zeng,<sup>a</sup> Wei Pan,<sup>a</sup> Junyong Zhang,<sup>\*a</sup> Yangzheng Cao,<sup>a</sup> Haiyang Guo<sup>a</sup> and Jingli Xie<sup>a,b\*</sup>

**Table S1** Crystalline data and structural parameters of compounds **1-3**.

| Compounds                                                            | 1                                                 | 2                                                 | 3                                                 |
|----------------------------------------------------------------------|---------------------------------------------------|---------------------------------------------------|---------------------------------------------------|
| Empirical formula                                                    | C <sub>22</sub> H <sub>18</sub> O <sub>6</sub> Zn | C <sub>22</sub> H <sub>18</sub> O <sub>6</sub> Cd | C <sub>22</sub> H <sub>18</sub> O <sub>6</sub> Cd |
| Formula weight                                                       | 443.73                                            | 490.76                                            | 490.76                                            |
| Temperature/K                                                        | 296(2)                                            | 296(2)                                            | 296(2)                                            |
| Crystal system                                                       | Triclinic                                         | Triclinic                                         | Monoclinic                                        |
| Space group                                                          | <i>P</i> $\bar{1}$                                | <i>P</i> $\bar{1}$                                | <i>P</i> 2 <sub>1</sub> / <i>n</i>                |
| a/Å                                                                  | 5.9824(3)                                         | 5.9985(3)                                         | 5.99377(17)                                       |
| b/Å                                                                  | 11.4997(5)                                        | 11.6150(9)                                        | 20.9969(6)                                        |
| c/Å                                                                  | 14.2042(7)                                        | 14.3679(9)                                        | 14.6167(5)                                        |
| $\alpha$ /°                                                          | 106.267(4)                                        | 107.300(6)                                        | 90                                                |
| $\beta$ /°                                                           | 99.849(4)                                         | 99.607(5)                                         | 96.052(3)                                         |
| $\gamma$ /°                                                          | 98.211(4)                                         | 100.199(5)                                        | 90                                                |
| Volume/Å <sup>3</sup>                                                | 905.25(8)                                         | 914.62(11)                                        | 1829.27(10)                                       |
| Z                                                                    | 2                                                 | 2                                                 | 4                                                 |
| $\rho_{\text{calc}}/\text{cm}^3$                                     | 1.628                                             | 1.782                                             | 1.782                                             |
| $\mu/\text{mm}^{-1}$                                                 | 2.232                                             | 9.909                                             | 9.909                                             |
| F(000)                                                               | 456.0                                             | 492.0                                             | 984.0                                             |
| Radiation                                                            | CuK $\alpha$                                      | CuK $\alpha$                                      | CuK $\alpha$                                      |
| Reflections collected                                                | 10194                                             | 5724                                              | 7178                                              |
| Independent reflections                                              | 3489                                              | 3478                                              | 3530                                              |
| R <sub>int</sub>                                                     | 0.0323                                            | 0.0335                                            | 0.0327                                            |
| Goodness-of-fit on F <sup>2</sup>                                    | 1.070                                             | 1.033                                             | 1.176                                             |
| R <sub>1</sub> ,wR <sub>2</sub> [ <i>I</i> ≥2 $\sigma$ ( <i>I</i> )] | 0.0399, 0.1036                                    | 0.0321, 0.0773                                    | 0.0730, 0.1921                                    |

---

R<sub>1</sub>, wR<sub>2</sub> [all data]                      0.0452, 0.1089                      0.0365, 0.0814                      0.0819, 0.1999

<sup>a</sup> R<sub>1</sub> =  $\Sigma||F_o| - |F_c|| / \Sigma|F_o|$ , <sup>b</sup> wR<sub>2</sub> =  $\Sigma[w(F_o^2 - F_c^2)^2] / \Sigma[w(F_o^2)^2]^{1/2}$ .

---

**Table S2** The primary bond length (Å) and bond angle (°) of compounds **1–3**.

---

| <b>Compound 1</b>               |            |              |            |
|---------------------------------|------------|--------------|------------|
| Zn1–O1                          | 1.9505(17) | Zn1–O2       | 2.0777(19) |
| Zn1–O4                          | 1.9928(19) | Zn1–O1W      | 2.0309(19) |
| Zn1–O3                          | 2.443(2)   | Zn1–C22#1    | 2.544(2)   |
| O1–Zn1–O4                       | 157.68(8)  | O4–Zn1–O1W   | 91.58(8)   |
| O1–Zn1–O3                       | 116.66(8)  | O4–Zn1–C22#1 | 29.21(9)   |
| O1–Zn1–O2                       | 99.14(7)   | O3–Zn1–C22#1 | 28.96(8)   |
| O1–Zn1–O1W                      | 92.42(8)   | O2–Zn1–O3    | 85.84(7)   |
| O1–Zn1–C22#1                    | 142.19(9)  | O2–Zn1–C22#1 | 93.60(7)   |
| O4–Zn1–O3                       | 58.15(8)   | O1W–Zn1–O3   | 149.57(7)  |
| O4–Zn1–O2                       | 101.92(8)  | O1W–Zn1–O2   | 98.82(8)   |
| O1W–Zn1–C22#1                   | 120.67(9)  |              |            |
| Symmetry code: #1 +x, 1+y, -1+z |            |              |            |

---

| <b>Compound 2</b> |            |                |            |
|-------------------|------------|----------------|------------|
| Cd1–O4#1          | 2.411(3)   | Cd1–O2#3       | 2.350(3)   |
| Cd1–O5#2          | 2.472(2)   | Cd1–O1W        | 2.279(3)   |
| Cd1–O1            | 2.205(3)   | Cd1–C22#1      | 2.678(4)   |
| Cd1–O3#1          | 2.263(3)   | O2#3–Cd1–O4#1  | 83.99(9)   |
| O4#1–Cd1–O5#2     | 82.93(9)   | O2#3–Cd1–O5#2  | 160.41(10) |
| O4#1–Cd1–C22#1    | 28.16(11)  | O2#3–Cd1–C22#1 | 92.31(10)  |
| O5#2–Cd1–C22#1    | 82.92(9)   | O1W–Cd1–O4#1   | 138.11(10) |
| O1–Cd1–O4#1       | 137.12(10) | O1W–Cd1–O5#2   | 103.40(11) |
| O1–Cd1–O5#2       | 80.83(10)  | O1W–Cd1–O2#3   | 96.08(12)  |
| O1–Cd1–O3#1       | 157.81(11) | O1W–Cd1–C22#1  | 110.52(11) |
| O1–Cd1–O2#3       | 99.21(10)  | O3#1–Cd1–O5#2  | 84.49(9)   |

---

---

|               |            |                |            |
|---------------|------------|----------------|------------|
| O1–Cd1–O1W    | 84.41(11)  | O3#1–Cd1–O2#3  | 100.18(10) |
| O1–Cd1–C22#1  | 160.15(11) | O3#1–Cd1–O1W   | 82.92(10)  |
| O3#1–Cd1–O4#1 | 56.17(9)   | O3#1–Cd1–C22#1 | 28.00(11)  |

Symmetry codes: #1 +x, 1+y, -1+z; #2 1-x, 1-y, -z; #3 1-x, 2-y, -z.

---

**Compound 3**

---

|               |            |                |           |
|---------------|------------|----------------|-----------|
| Cd1–O1        | 2.204(6)   | Cd1–O3#1       | 2.425(5)  |
| Cd1–O4#1      | 2.253(6)   | Cd1–O5#3       | 2.479(6)  |
| Cd1–O1W       | 2.272(6)   | Cd1–C22#1      | 2.686(8)  |
| Cd1–O2#2      | 2.348(6)   | O4#1–Cd1–O5#3  | 84.05(19) |
| O1–Cd1–O4#1   | 157.8(2)   | O1W–Cd1–O5#3   | 103.1(2)  |
| O1–Cd1–O1W    | 85.1(2)    | O2#2–Cd1–O5#3  | 160.3(2)  |
| O4#1–Cd1–O1W  | 81.8(2)    | O3#1–Cd1–O5#3  | 82.36(18) |
| O1–Cd1–O2#2   | 99.4(2)    | O1–Cd1–C22#1   | 160.5(2)  |
| O4#1–Cd1–O2#2 | 99.8(2)    | O4#1–Cd1–C22#1 | 27.6(2)   |
| O1W–Cd1–O2#2  | 96.5(2)    | O1W–Cd1–C22#1  | 109.1(2)  |
| O1–Cd1–O3#1   | 137.7(2)   | O2#2–Cd1–C22#1 | 92.3(2)   |
| O4#1–Cd1–O3#1 | 55.80(19)  | O3#1–Cd1–C22#1 | 28.2(2)   |
| O1W–Cd1–O3#1  | 136.76(19) | O5#3–Cd1–C22#1 | 82.20(19) |
| O2#2–Cd1–O3#1 | 83.94(19)  | O1–Cd1–O5#3    | 81.6(2)   |

Symmetry codes: #1 +x, -1+y, +z; #2 1-x, -y, 1-z; #3 1/2-x, -1/2+y, 1/2-z.

---

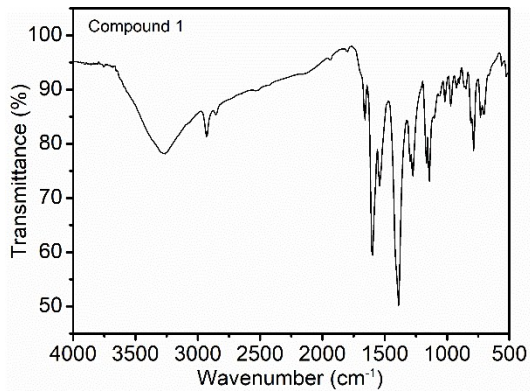

(a)

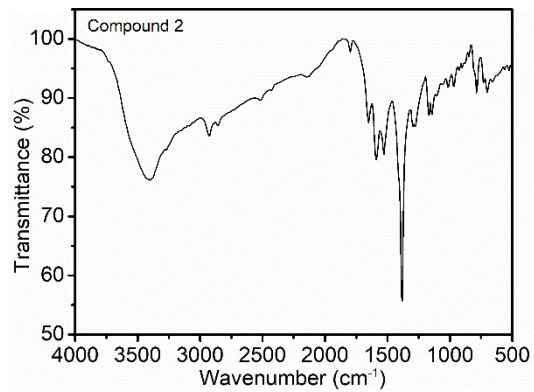

(b)

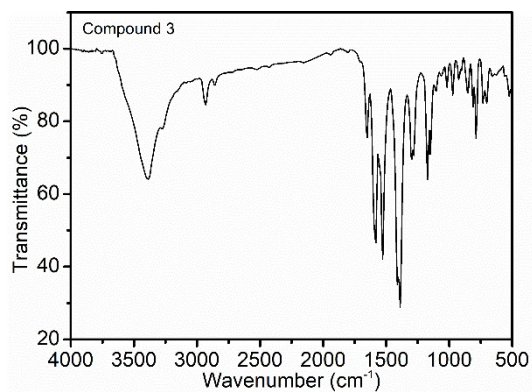

(c)

Fig. S1 IR spectra of compounds 1–3.

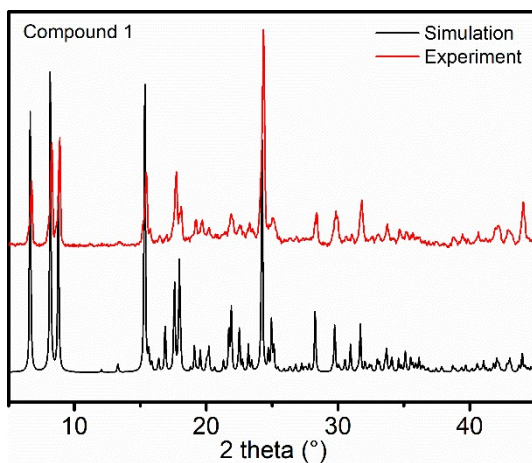

(a)

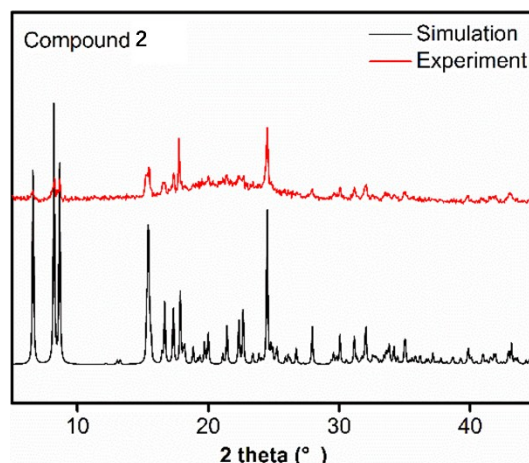

(b)

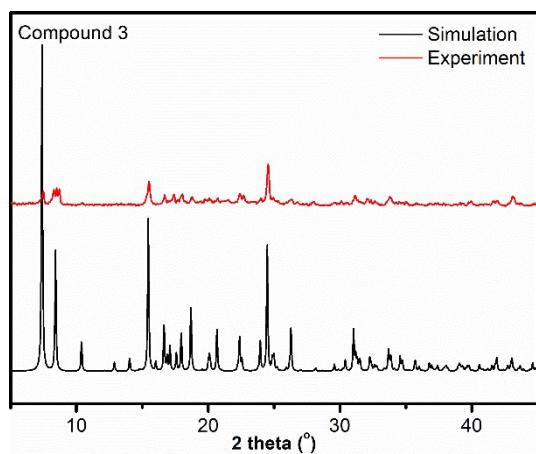

(c)

Fig. S2 The PXR D patterns of compounds 1–3.

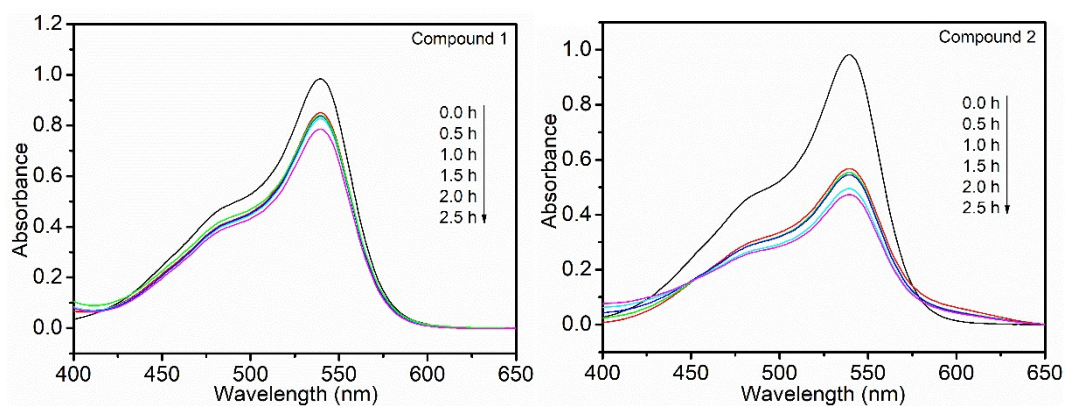

Fig. S3 Photocatalytic effects of compounds 1 and 2 on PH solution.

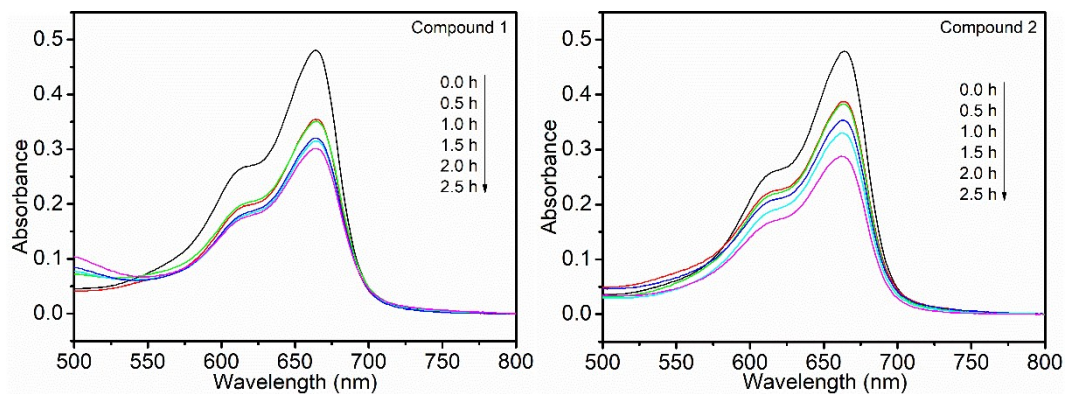

Fig. S4 Photocatalytic effects of compounds 1 and 2 on MB solution.
